# Supplementary material for: Impulsive Lifestyle Counselling Versus Treatment as Usual to Reduce Offending in People with Co-Occurring Antisocial Personality Disorder and Substance Use Disorder: A Post Hoc Analysis - BMC
Source: Research Square preprint supplement (doi:10.21203/rs.3.rs-534437/v1), 2021-07-26
Supplement: Supplementary file 1 [file ce7861bf5881ad1301d3b615.docx]

**Checklist of items for reporting pragmatic trials**

| Section | Item | Standard CONSORT description | Extension for pragmatic trials | Found in |
| --- | --- | --- | --- | --- |
| Title and abstract | 1 | How participants were allocated to interventions (eg, “random allocation,” “randomised,” or “randomly assigned”) |  | Title page and abstract. Described under “design” n abstract. |
| **Introduction** |  |  |  |  |
| Background | 2 | Scientific background and explanation of rationale | Describe the health or health service problem that the intervention is intended to address and other interventions that may commonly be aimed at this problem | Under background section. |
| **Methods** |  |  |  |  |
| Participants | 3 | Eligibility criteria for participants; settings and locations where the data were collected | Eligibility criteria should be explicitly framed to show the degree to which they include typical participants and/or, where applicable, typical providers (eg, nurses), institutions (eg, hospitals), communities (or localities eg, towns) and settings of care (eg, different healthcare financing systems) | Inclusion criteria, settings described as free community-based treatment. |
| Interventions | 4 | Precise details of the interventions intended for each group and how and when they were actually administered | Describe extra resources added to (or resources removed from) usual settings in order to implement intervention. Indicate if efforts were made to standardise the intervention or if the intervention and its delivery were allowed to vary between participants, practitioners, or study sites | The experiment and control group are described in the Interventions section |
| Describe the comparator in similar detail to the intervention |  |
| Objectives | 5 | Specific objectives and hypotheses |  |  |
| Outcomes | 6 | Clearly defined primary and secondary outcome measures and, when applicable, any methods used to enhance the quality of measurements (eg, multiple observations, training of assessors) | Explain why the chosen outcomes and, when relevant, the length of follow-up are considered important to those who will use the results of the trial | Described under outcomes. In addition, the lack of this central outcome is mentioned in the discussion with reference to the Cochrane review. |
| Sample size | 7 | How sample size was determined; explanation of any interim analyses and stopping rules when applicable | If calculated using the smallest difference considered important by the target decision maker audience (the minimally important difference) then report where this difference was obtained | Sample size was not calculate a priori. |
| Randomisation—sequence generation | 8 | Method used to generate the random allocation sequence, including details of any restriction (eg, blocking, stratification) |  | The size of blocks is described. |
| Randomisation—allocation concealment | 9 | Method used to implement the random allocation sequence (eg, numbered containers or central telephone), clarifying whether the sequence was concealed until interventions were assigned |  | Described under Randomization. |
| Randomisation—implementation | 10 | Who generated the allocation sequence, who enrolled participants, and who assigned participants to their groups |  | This is described under randomization. |
| Blinding (masking) | 11 | Whether participants, those administering the interventions, and those assessing the outcomes were blinded to group assignment | If blinding was not done, or was not possible, explain why | Blinding was not possible, but given the nature of the study, this is not meaningful. However, the outcome was collected by police and judges who were likely to be blinded to random assignment (and even unaware that it took place). We do not feel that this is necessary to mention. |
| Statistical methods | 12 | Statistical methods used to compare groups for primary outcomes; methods for additional analyses, such as subgroup analyses and adjusted analyses |  | Described under statistical analyses. |
| **Results** |  |  |  |  |
| Participant flow | 13 | Flow of participants through each stage (a diagram is strongly recommended)—specifically, for each group, report the numbers of participants randomly assigned, receiving intended treatment, completing the study protocol, and analysed for the primary outcome; describe deviations from planned study protocol, together with reasons | The number of participants or units approached to take part in the trial, the number which were eligible, and reasons for non-participation should be reported | The flow of participants was originally reported in an open access paper published in BMC Psychiatry. However, exclusion due to faulty ID-numbers are described in the Results section. |
| Recruitment | 14 | Dates defining the periods of recruitment and follow-up |  | Described under Design and Setting. |
| Baseline data | 15 | Baseline demographic and clinical characteristics of each group |  | Described in Table 1. |
| Numbers analysed | 16 | Number of participants (denominator) in each group included in each analysis and whether analysis was by “intention-to-treat”; state the results in absolute numbers when feasible (eg, 10/20, not 50%) |  | Described under statistical analyses. However, since all patients were included, no fraction is described. |
| Outcomes and estimation | 17 | For each primary and secondary outcome, a summary of results for each group and the estimated effect size and its precision (eg, 95% CI) |  | Both incremental risk ratios and means with Poisson confidence intervals are given. Means in the first paragraph of the results, IRRs under the sub-heading “Results of count regression models”. |
| Ancillary analyses | 18 | Address multiplicity by reporting any other analyses performed, including subgroup analyses and adjusted analyses, indicating which are prespecified and which are exploratory |  | It is stated in the title and abstract that this is a post hoc secondary analysis. However, in terms of interpretation, we focus only on one outcome for this study. |
| Adverse events | 19 | All important adverse events or side effects in each intervention group |  | Not applicable for this report. |
| **Discussion** |  |  |  |  |
| Interpretation | 20 | Interpretation of the results, taking into account study hypotheses, sources of potential bias or imprecision, and the dangers associated with multiplicity of analyses and outcomes |  | Limitations are mentioned for measurement, especially that undetected crime was not included. |
| Generalisability | 21 | Generalisability (external validity) of the trial findings | Describe key aspects of the setting which determined the trial results. Discuss possible differences in other settings where clinical traditions, health service organisation, staffing, or resources may vary from those of the trial | Discussion, section starting “The findings were based…” |
| Overall evidence | 22 | General interpretation of the results in the context of current evidence |  | Conclusion statement |

***Cite as:*** *Zwarenstein M, Treweek S, Gagnier JJ, Altman DG, Tunis S, Haynes B, Oxman AD, Moher D for the CONSORT and Pragmatic Trials in Healthcare (Practihc) group. Improving the reporting of pragmatic trials: an extension of the CONSORT statement. BMJ 2008; 337;a2390.*
